# Supplementary material for: Diverse Vaginal Microbiomes in Reproductive-Age Women with Vulvovaginal Candidiasis
Source: PubMed Central journal article supplement (PMC3827160; doi:10.1371/journal.pone.0079812), 2013-11-12

■ BV
 ■ BV.VVC
 ■ NC

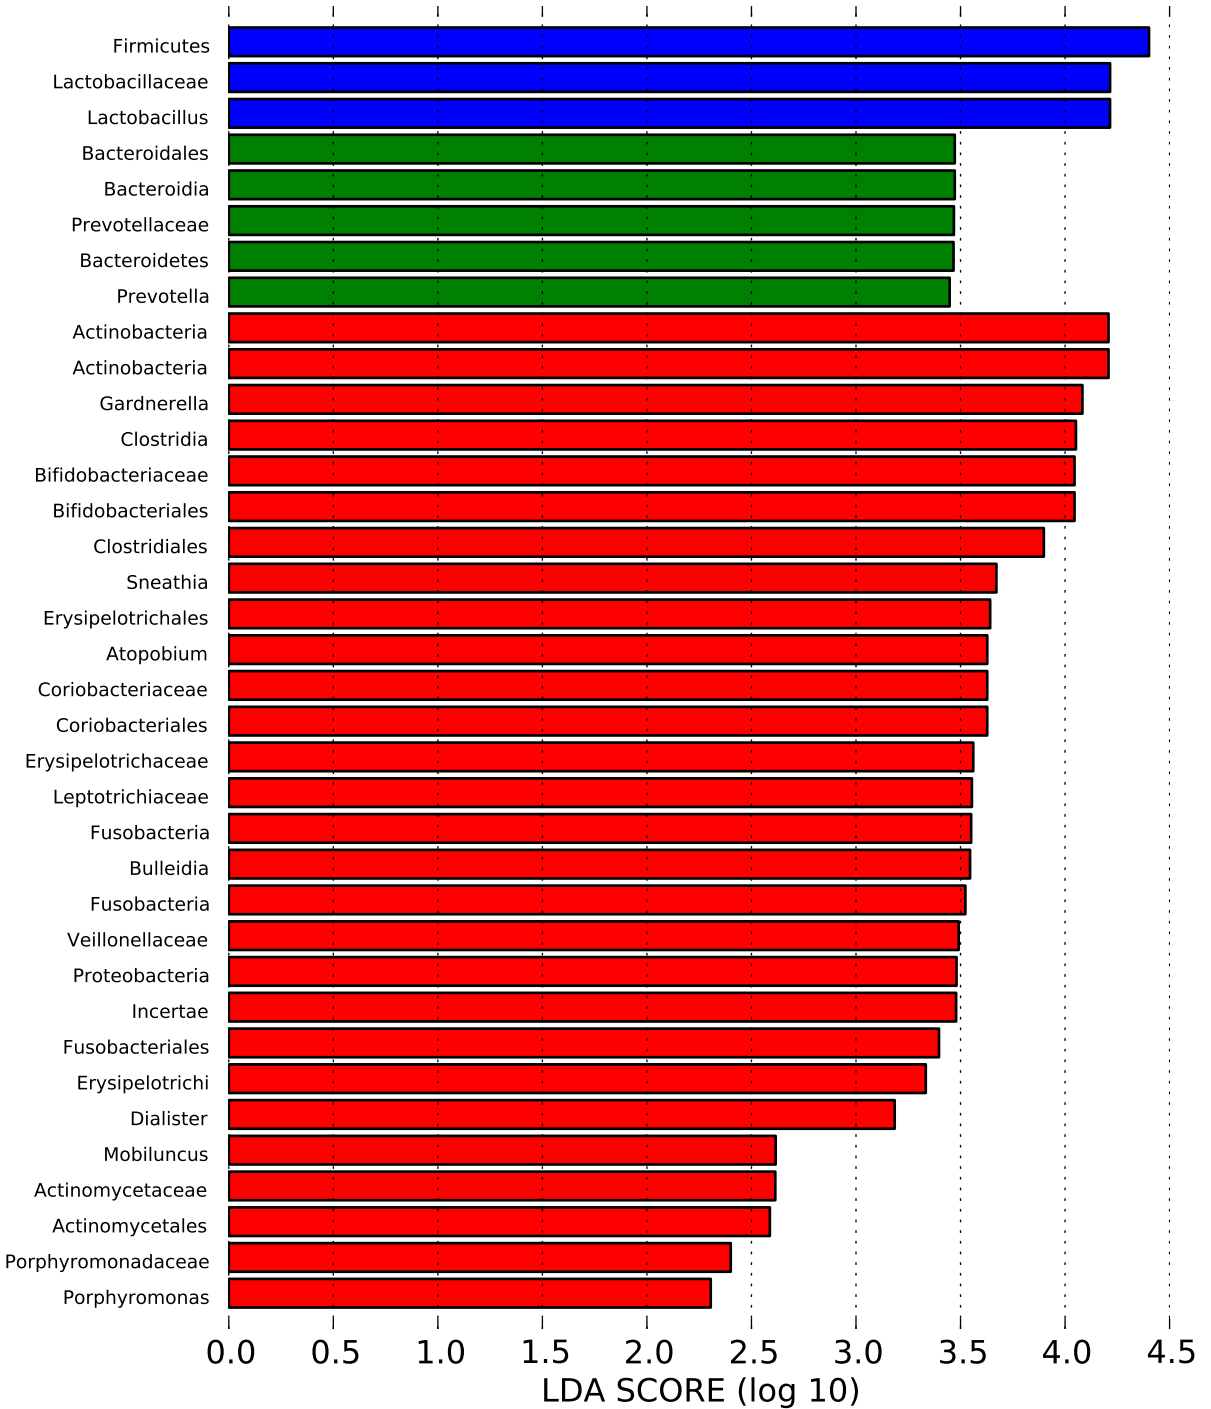

Supplement: pone.0079812.s001.pdf [file pone.0079812.s001.pdf]
